# Supplementary material
Source: MDPI journal article supplement (https://www.mdpi.com/2071-1050/12/19/8099)
Supplement: s1 [file s1]

## Supplementary

### Interview Script

- What role do you think the nurse has played in the work done in the homes during this pandemic?
- Why do you think this role had not been developed before?
- To what extent do you think that the emotional situations experienced during confinement have interfered in the learning process of the patient and caregiver?
- Do you think that your work is being recognized by users of the home environment?
- What are the aspects that the nurses have most valued regarding the care provided by nurses?
- Do you think the visibility of the nursing profession has changed during the pandemic?
- What, if anything, has the nursing profession gained, from your point of view, in this pandemic?

### Focus Group

Guiding question: What is your opinion regarding the professional identity of nurses and their role with users and family members in the home environment?
